# Supplementary material for: Electrodeposition of ultrathin nickel–cobalt double hydroxide nanosheets on nickel foam as high-performance supercapacitor electrodes
Source: Royal Society of Chemistry journal article supplement (doi:10.1039/c5ra17481c), 2015-01-01
Supplement: c5ra17481c1.pdf [file c5ra17481c1.pdf]

Electronic Supplementary Information

## Electrodeposition of ultrathin nickel-cobalt double hydroxide nanosheets on nickel foam as high-performance supercapacitor electrodes

Junheng Xing<sup>a</sup>, Shaoyan Wu<sup>a, b</sup> and K. Y. Simon Ng<sup>a\*</sup>

<sup>a</sup> *Department of Chemical Engineering and Materials Science, Wayne State University, Detroit, MI 48202, USA*

<sup>b</sup> *Department of Bioengineering, Zhixing College of Hubei University, Wuhan, Hubei 430011, China*

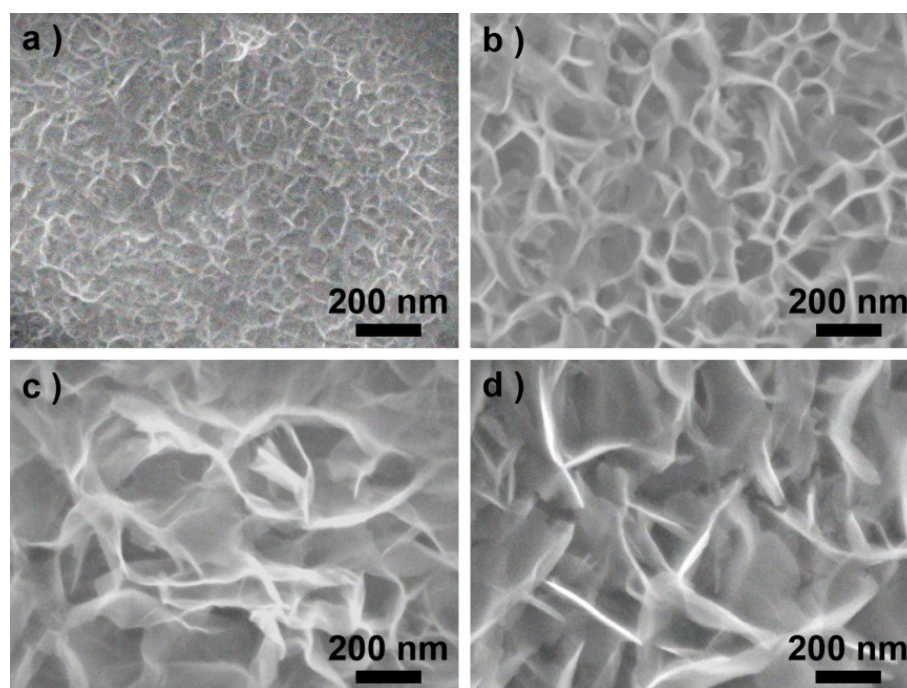

**Figure S1** SEM images of electrodeposited Ni-Co DH nanosheets in solution with different Ni/Co molar ratios: (a) 1/0, (b) 2/1 (c) 1/2, and (d) 0/1.

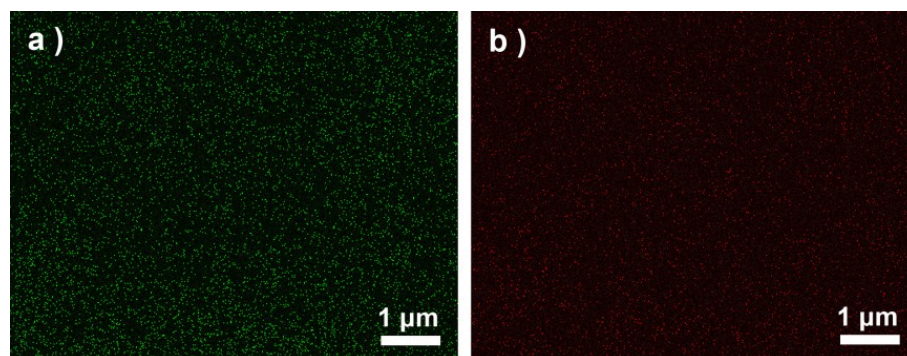

**Figure S2** EDS mapping images of Ni-Co DH nanosheets obtained in solution of Ni/Co (1/1): (a) Ni, (b) Co. The green color is Ni and the red color indicates Co.

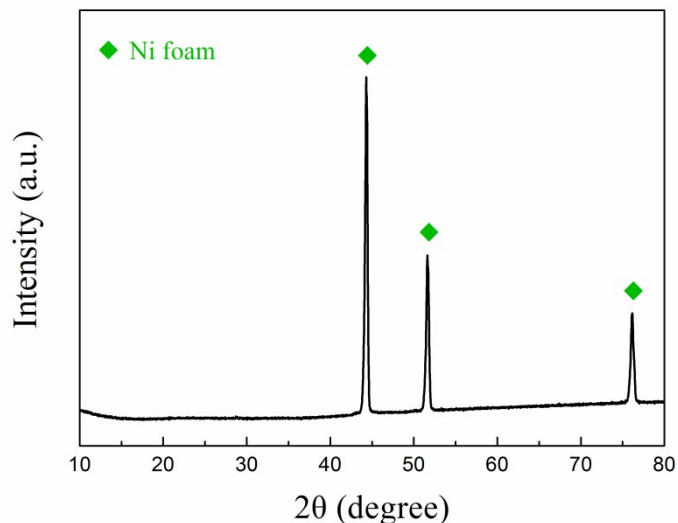

**Figure S3** XRD patterns of Ni foam supported Ni-Co DHs obtained in solution of Ni/Co (1/1).

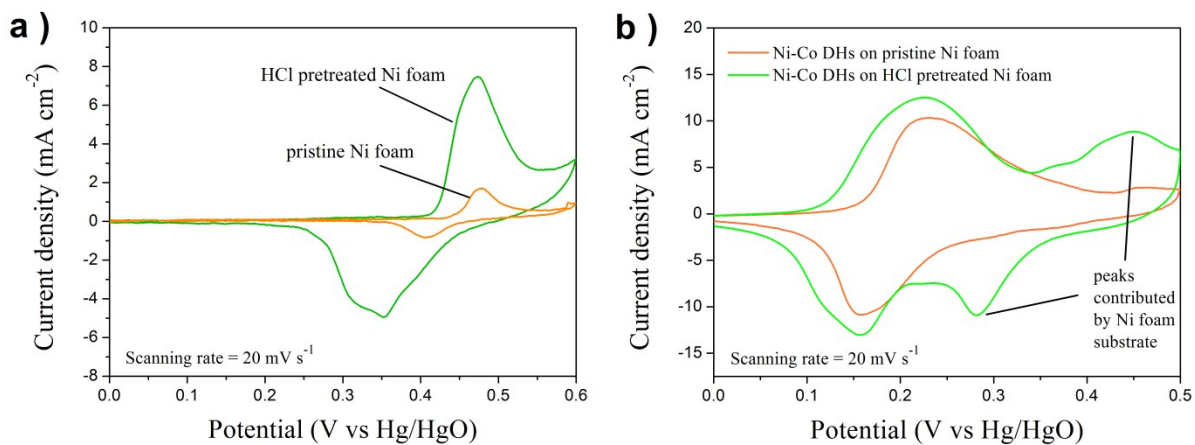

**Figure S4** Comparison of CV curves of (a) pristine Ni foam and HCl pretreated Ni foam and (b) Ni-Co DHs deposited in the solution of Ni/Co (1/1) on Ni foam substrates without and with HCl pretreatment.

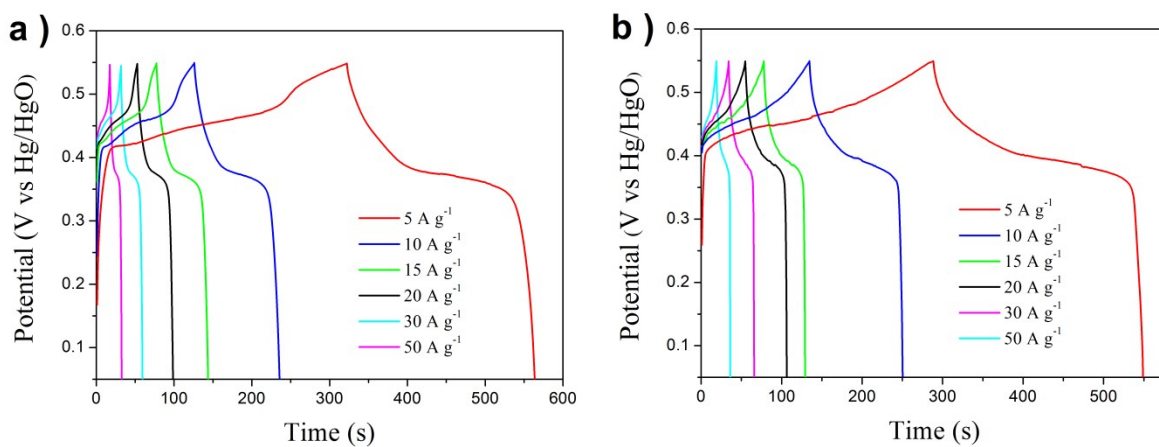

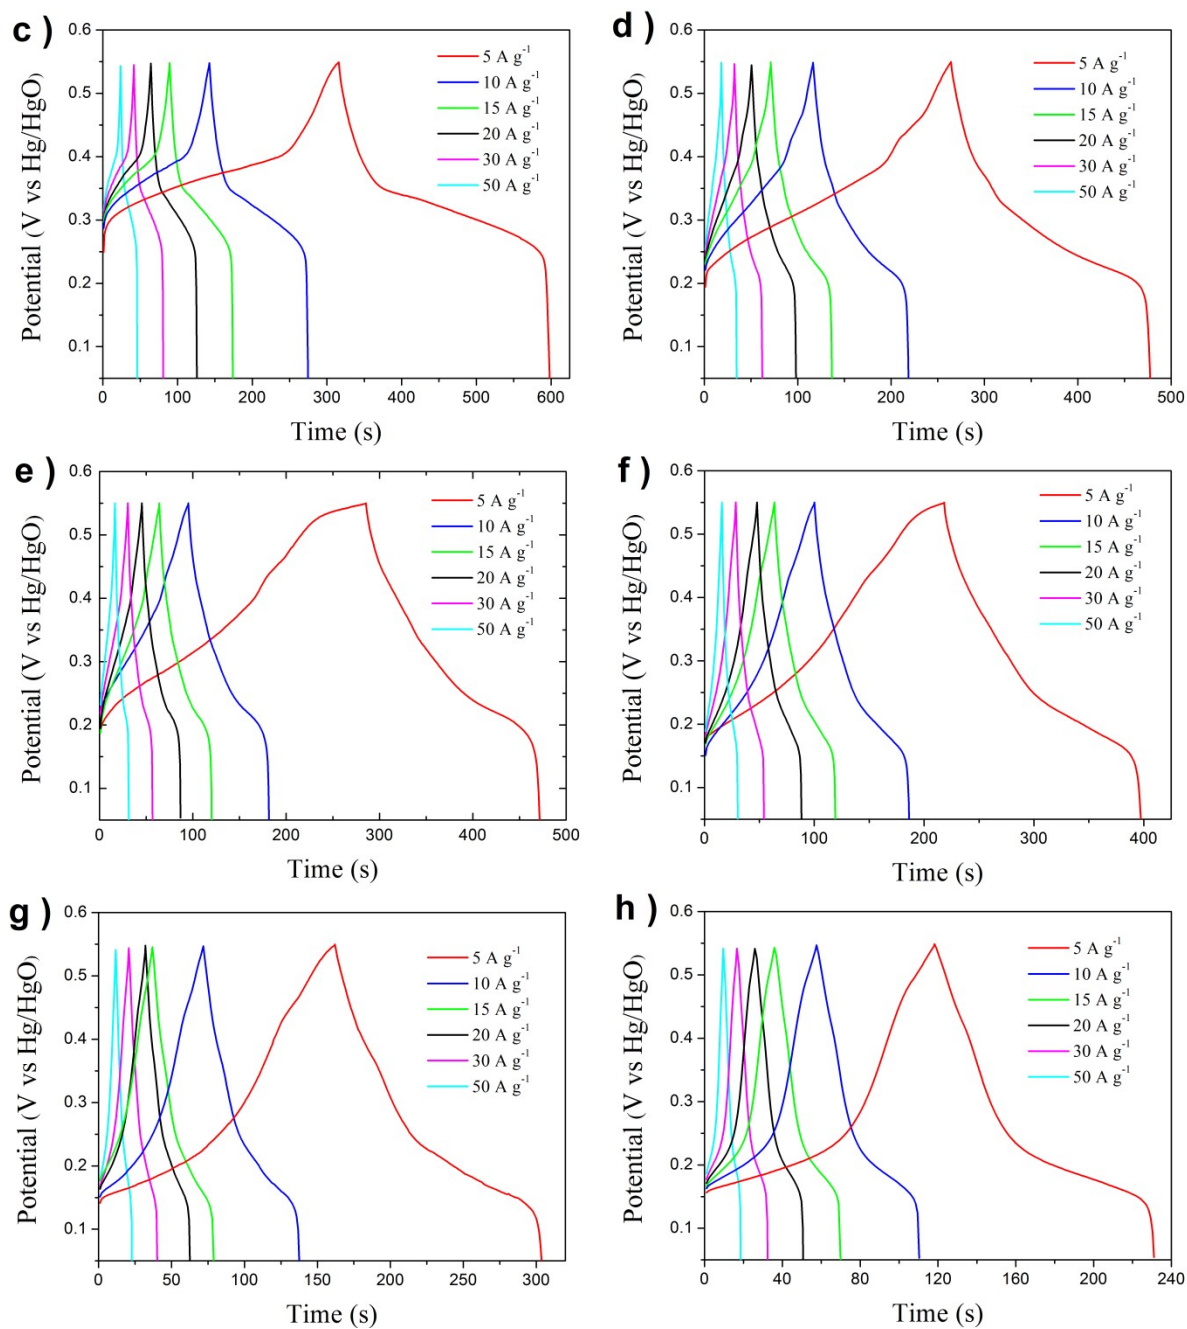

**Figure S5** Galvanostatic charge/discharge curves at different current density of Ni foam supported Ni-Co DHs formed with different Ni/Co feeding molar ratios: (a) 1/0, (b) 9/1, (c) 4/1, (d) 3/2, (e) 1/1, (f) 1/2, (g) 1/3, and (h) 0/1.

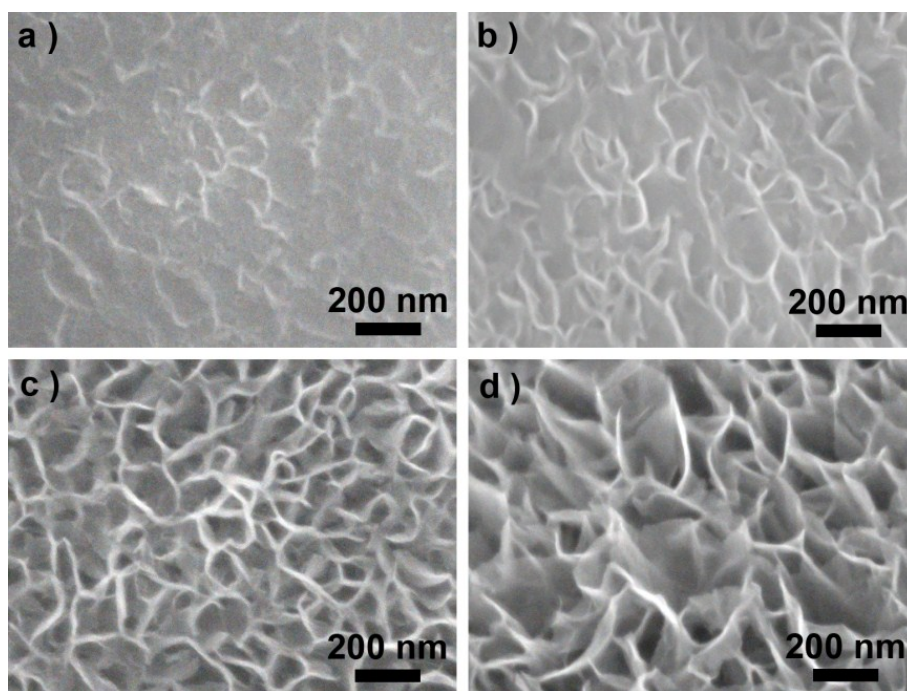

**Figure S6** SEM images of Ni-Co DHs after 2000 cycles of charge/discharge tests: (a) Ni/Co (1/0), (b) Ni/Co (4/1), (c) Ni/Co (1/1), (d) Ni/Co (0/1).

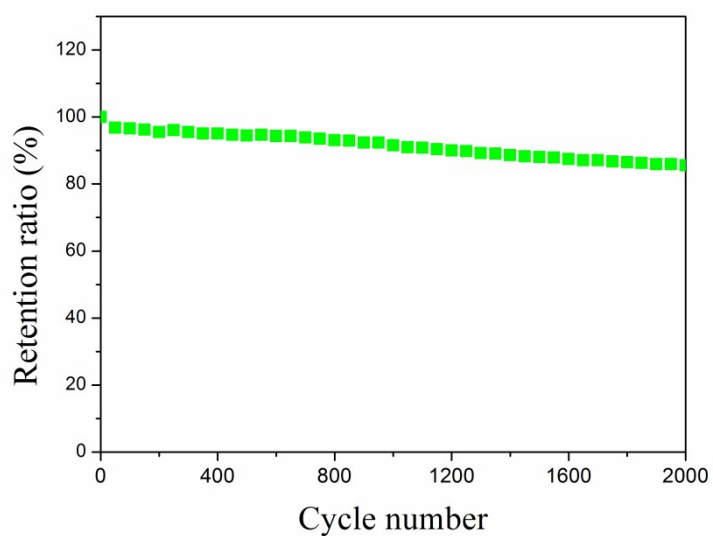

**Figure S7** Cycle performance of Ni-Co DHs formed in solution of Ni/Co (1/1) without immersing pretreatment.

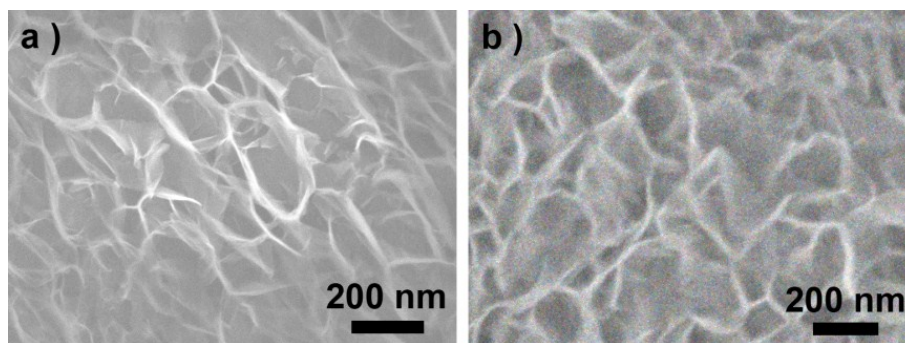

**Figure S8** SEM images of Ni-Co DHs formed in solution of Ni/Co (1/1) without pre-immersing process (a) before and (b) after 2000 cycles of galvanostatic charge-discharge tests.

**Table S1** Comparison of maximum (at low current density) and minimum (at high current density)  $C_s$ , cycle stability, and maximum (at low power density) and minimum (at high power density) energy density based on active materials of some reported supercapacitor electrodes of Ni-based oxides/hydroxides

| Ref. | Electrode materials                                 | $C_s$ (F g <sup>-1</sup> )       |                                   | Stability*                | Energy density (Wh kg <sup>-1</sup> ) |                                       |
|------|-----------------------------------------------------|----------------------------------|-----------------------------------|---------------------------|---------------------------------------|---------------------------------------|
|      |                                                     | Maximum                          | Minimum                           |                           | Maximum                               | Minimum                               |
| 1    | Ni(OH) <sub>2</sub>                                 | 3152<br>(4 A g <sup>-1</sup> )   | 280<br>(16 A g <sup>-1</sup> )    | 48%<br>(after 300 cycles) | --                                    | --                                    |
| 2    | NiO                                                 | 309<br>(1 A g <sup>-1</sup> )    | 221<br>(40 A g <sup>-1</sup> )    | ~ 91%**                   | --                                    | --                                    |
| 3    | Ni-Co LDHs***                                       | 2184<br>(1 A g <sup>-1</sup> )   | 1494<br>(20 A g <sup>-1</sup> )   | 88.5%                     | 91.76<br>(0.826 kW kg <sup>-1</sup> ) | ~ 62<br>(~ 11 kW kg <sup>-1</sup> )   |
| 4    | Ni-Co DH microspheres                               | 2275.5<br>(1 A g <sup>-1</sup> ) | 1007.8<br>(25 A g <sup>-1</sup> ) | ~ 95%                     | --                                    | --                                    |
| 5    | Ni-Co LDHs/ZnO nanoflake                            | 1624<br>(10 A g <sup>-1</sup> )  | 1311<br>(50 A g <sup>-1</sup> )   | 94 %                      | 68.23<br>(2.75 kW kg <sup>-1</sup> )  | 48.32<br>(27.53 kW kg <sup>-1</sup> ) |
| 6    | NiCo(OH) <sub>2</sub> /graphene/carbon nanotube     | 2360<br>(0.5 A g <sup>-1</sup> ) | 2030<br>(20 A g <sup>-1</sup> )   | ~ 81%                     | --                                    | --                                    |
| 7    | NiCo <sub>2</sub> O <sub>4</sub> nanowire/Ni-Co DHs | --                               | --                                | ~ 69%                     | ~ 96<br>(~ 1 kW kg <sup>-1</sup> )    | 58.4<br>(41.3 kW kg <sup>-1</sup> )   |
| 8    | Ni-Co LDHs                                          | 2682<br>(3 A g <sup>-1</sup> )   | 1706<br>(20 A g <sup>-1</sup> )   | --                        | 77.3<br>(0.623 kW kg <sup>-1</sup> )  | ~ 40<br>(~ 1.3 kW kg <sup>-1</sup> )  |
| 9    | Ni-Mn LDHs                                          | 881<br>(1 A g <sup>-1</sup> )    | 403<br>(10 A g <sup>-1</sup> )    | 88%<br>(after 500 cycles) | --                                    | --                                    |

|                   |                                  |                                  |                                 |                              |                                           |                                           |
|-------------------|----------------------------------|----------------------------------|---------------------------------|------------------------------|-------------------------------------------|-------------------------------------------|
| 10                | Ni-Al LDHs/graphene              | 1255.8<br>(1 A g <sup>-1</sup> ) | 755.6<br>(6 A g <sup>-1</sup> ) | ~ 79%****                    | --                                        | --                                        |
| 11                | Ni-Al LDHs/graphene              | 1329<br>(3.6 A g <sup>-1</sup> ) | 851<br>(18 A g <sup>-1</sup> )  | 91%<br>(after 500<br>cycles) | --                                        | --                                        |
| 12                | Ni-Al LDH/carbon nanotube        | 1500<br>(1 A g <sup>-1</sup> )   | 1054<br>(10 A g <sup>-1</sup> ) | 50%                          | --                                        | --                                        |
| This<br>wor<br>-k | Ni-Co DHs<br>(electrodeposition) | 3028<br>(2 A g <sup>-1</sup> )   | 2225<br>(50 A g <sup>-1</sup> ) | 94%                          | 127.22<br>(0.605<br>kW kg <sup>-1</sup> ) | 93.48<br>(15.125<br>kW kg <sup>-1</sup> ) |

\* C<sub>s</sub> retention ratios after 2000 cycles galvanostatic charge-discharge tests

\*\* based on the maximum C<sub>s</sub>

\*\*\* LDHs (layered double hydroxides)

\*\*\*\* after 1500 cycles, based on the maximum C<sub>s</sub>

## References

1. G. Yang, C. Xu and H. Li, *Chem. Commun.*, 2008, **0**, 6537-6539.
2. X. Xia, J. Tu, X. Wang, C. Gu and X. Zhao, *J. Mater. Chem.*, 2011, **21**, 671-679.
3. X. Zheng, Z. Gu, Q. Hu, B. Geng and X. Zhang, *RSC Adv.*, 2015, **5**, 17007-17013.
4. T. Yan, Z. Li, R. Li, Q. Ning, H. Kong, Y. Niu and J. Liu, *J. Mater. Chem.*, 2012, **22**, 23587-23592.
5. N. T. H. Trang, H. Van Ngoc, N. Lingappan and D. J. Kang, *Nanoscale*, 2014, **6**, 2434-2439.
6. Y. Cheng, H. Zhang, C. V. Varanasi and J. Liu, *Energy Environ. Sci.*, 2013, **6**, 3314-3321.
7. L. Huang, D. Chen, Y. Ding, S. Feng, Z. L. Wang and M. Liu, *Nano Lett.*, 2013, **13**, 3135-3139.
8. H. Chen, L. Hu, M. Chen, Y. Yan and L. Wu, *Adv. Funct. Mater.*, 2014, **24**, 934-942.
9. H. Sim, C. Jo, T. Yu, E. Lim, S. Yoon, J. H. Lee, J. Yoo, J. Lee and B. Lim, *Chem. Eur. J.*, 2014, **20**, 14880-14884.
10. L. Zhang, J. Wang, J. Zhu, X. Zhang, K. San Hui and K. N. Hui, *J. Mater. Chem. A*, 2013, **1**, 9046-9053.
11. J. Xu, S. Gai, F. He, N. Niu, P. Gao, Y. Chen and P. Yang, *J. Mater. Chem. A*, 2014, **2**, 1022-1031.
12. M. Li, F. Liu, J. Cheng, J. Ying and X. Zhang, *J. Alloys Compd.*, 2015, **635**, 225-232.
